# Supplementary material for: Removal of waterborne phage and NO3− in the nZVI/phage/NO3− system: competition effect
Source: Royal Society of Chemistry journal article supplement (doi:10.1039/c7ra01724c), 2017-01-01
Supplement: c7ra01724c1.pdf [file c7ra01724c1.pdf]

### Characteration of nZVI

As shown in Fig. S1, the synthesized particles were relatively uniform, and the average particle size was about 50 nm. Peaks identified on the XRD pattern of the particles were  $\text{Fe}^0$  (Fig. S2). No other peaks were detected, indicating the high purity of the samples.

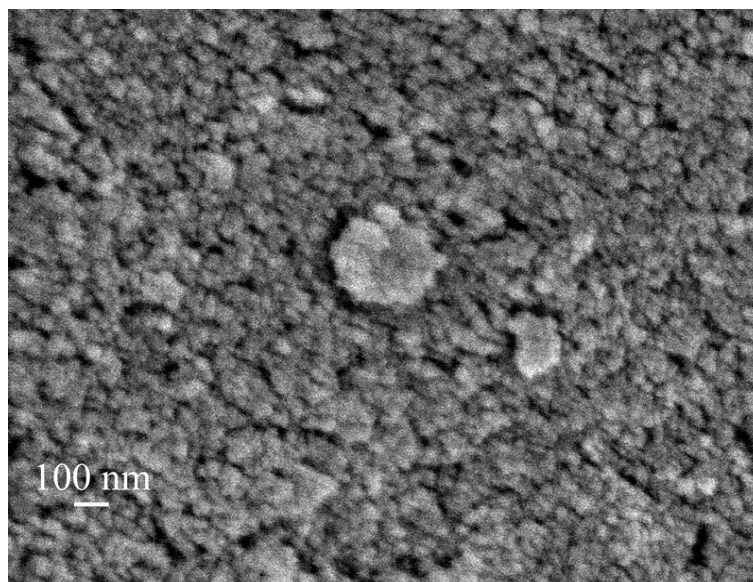

**Fig. S1.** SEM image of nanoscale zero-valent iron

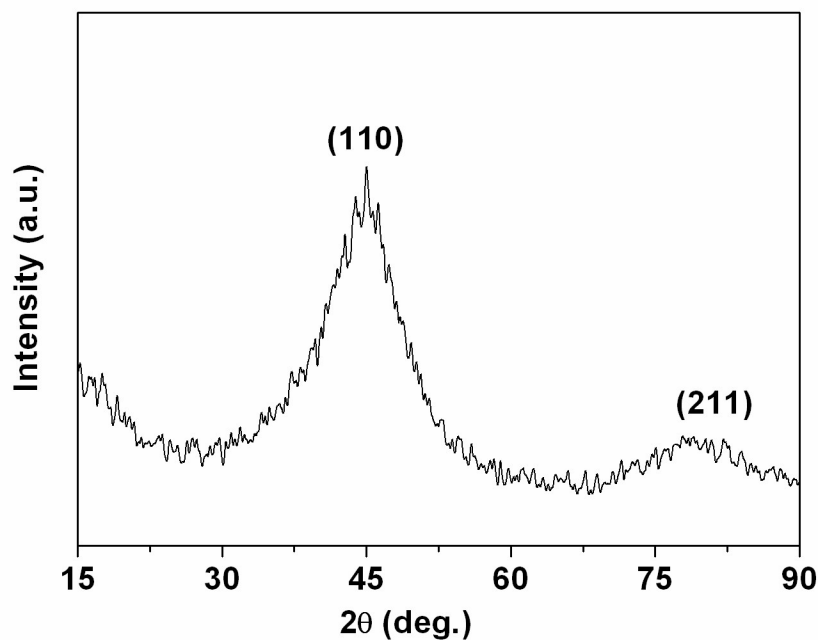

**Fig. S2.** XRD spectrum of nanoscale zero-valent iron
